# Supplementary material
Source: Springer Nature journal article supplement (https://www.springermedizin.de/resource/supplementary/12877_2012_857_MOESM1_ESM.pdf/9440540)

Total number of citations retrieved and screened;  $n = 398$

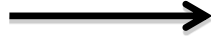

**Excluded citations: 1<sup>st</sup> round exclusion**

Non RCT study design;  $n = 79$ ;  
Participants with renal impairment, liver disease or malignancy;  $n = 51$ ;  
Mean age  $\leq 60$  years;  $n = 46$ ;  
Participants with CVD or CVD risk factors  $n = 40$ ;  
Dietary studies; e.g. fish intake or functional food containing EPA and/or DHA;  $n = 27$ ;  
Case studies and/or review articles;  $n = 13$ ;  
Duplicates;  $n = 12$ ;  
Enteral or TPN route of administration;  $n = 11$ ;  
Non fish oil administration;  $n = 3$ ;  
Non-English language;  $n = 2$ ;  
Cost effective analysis;  $n = 1$

Total number of citations maintained for second round of screening;  $n = 113$

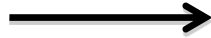

**Excluded citations: 2<sup>nd</sup> round exclusion**

Mean age  $\leq 60$  years;  $n = 76$ ;  
Dietary studies; e.g. fish intake or functional food containing EPA and/or DHA;  $n = 14$ ;  
Non RCT study design;  $n = 3$ ;  
Non placebo controlled (e.g. no active matched control);  $n = 2$ ;  
Enteral or TPN route of administration;  $n = 1$

RCTs retained and reviewed;  
 $n = 17(10)$

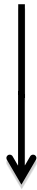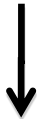

Supplement: MOESM1 [file 9440540]
